# Supplementary material for: Nasal delivery of H5N1 avian influenza vaccine formulated with GenJet™ or in vivo-jetPEI® induces enhanced serological, cellular and protective immune responses
Source: PubMed Central journal article supplement (PMC6058713; doi:10.1080/10717544.2018.1450909), 2018-03-15

Supplementary Figure 1

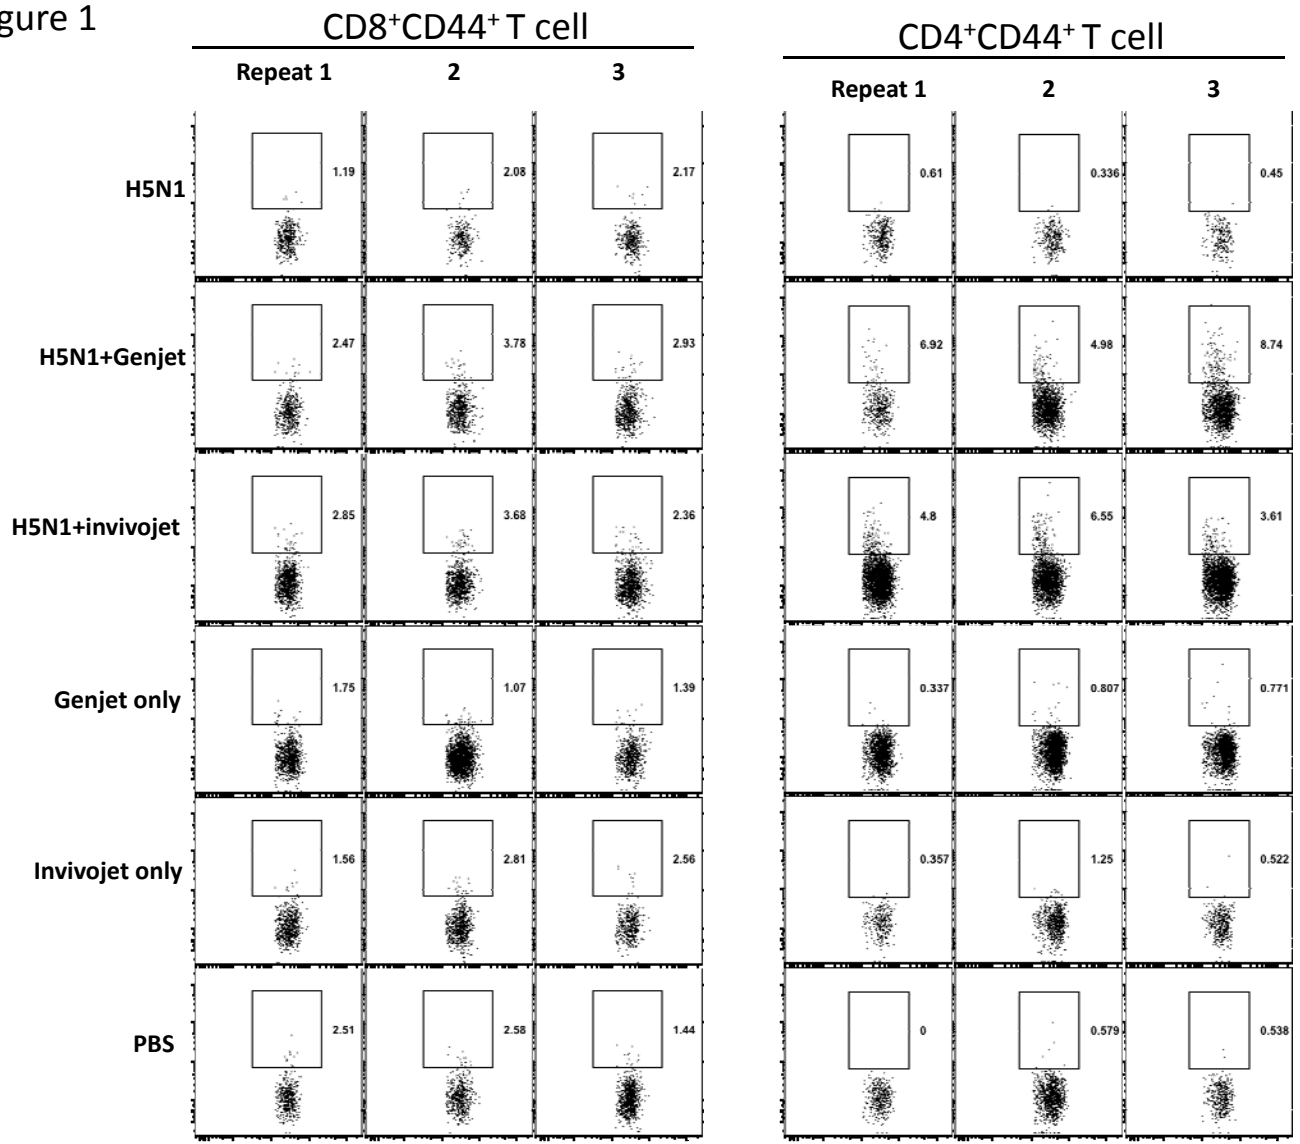

Supplement: IDRD_A_1450909_SM1313.pdf [file IDRD_A_1450909_SM1313.pdf]
